# Supplementary material for: Synthesis of aryl-substituted 2-pyridyl-1,10-phenanthrolines; a series of oriented terpyridine analogues
Source: Royal Society of Chemistry journal article supplement (doi:10.1039/b804106g), 2008-01-01
Supplement: b804106g.pdf [file b804106g.pdf]

# Synthesis of Aryl-substituted 2-Pyridyl-1,10-phenanthrolines; A Series of Oriented Terpyridine Analogues

Jeremy K. Klosterman, Anthony Linden and Jay S. Siegel\*

Receipt/Acceptance Data [DO NOT ALTER/DELETE THIS TEXT]

Publication data [DO NOT ALTER/DELETE THIS TEXT]

DOI: 10.1039/b000000x [DO NOT ALTER/DELETE THIS TEXT]

Supporting information.

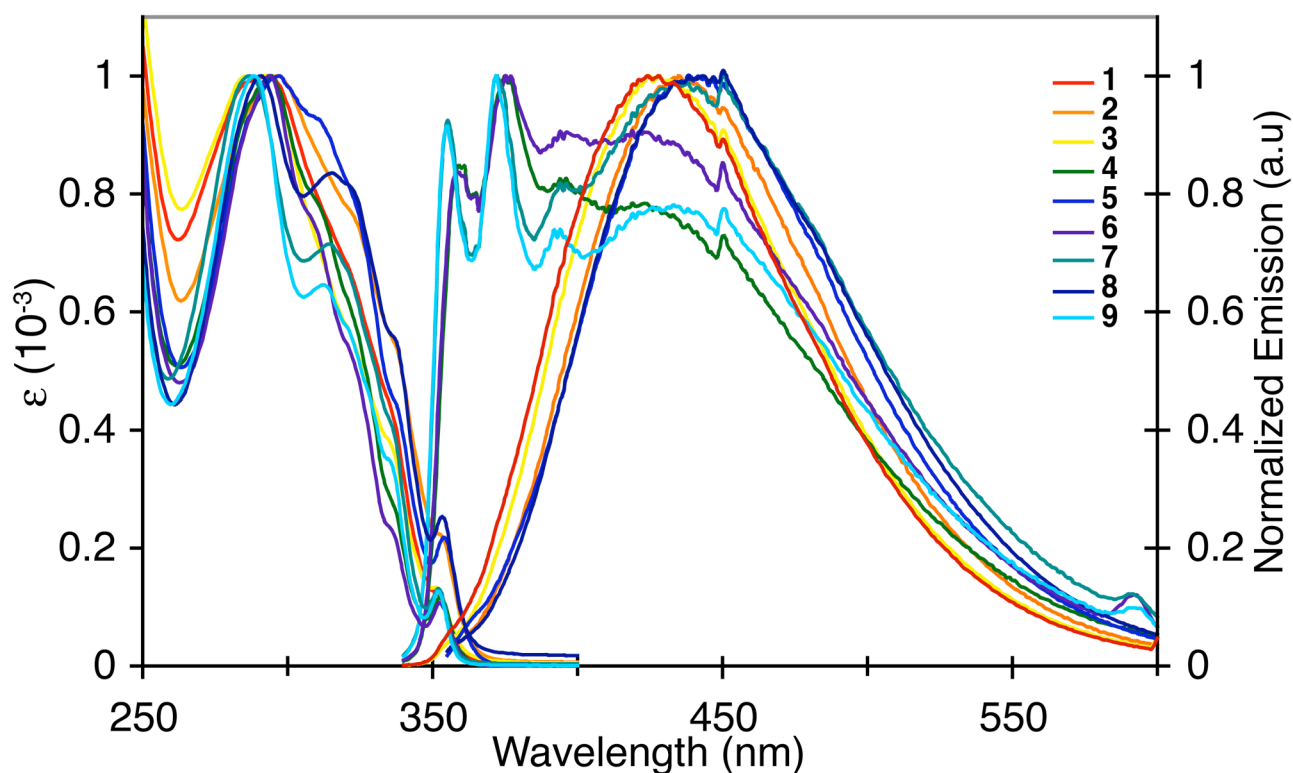

Fig. S1 Combined normalized absorption and emission spectra of manisyl-substituted pyridyl-phenanthrolines 1 – 9.<sup>1</sup>

10

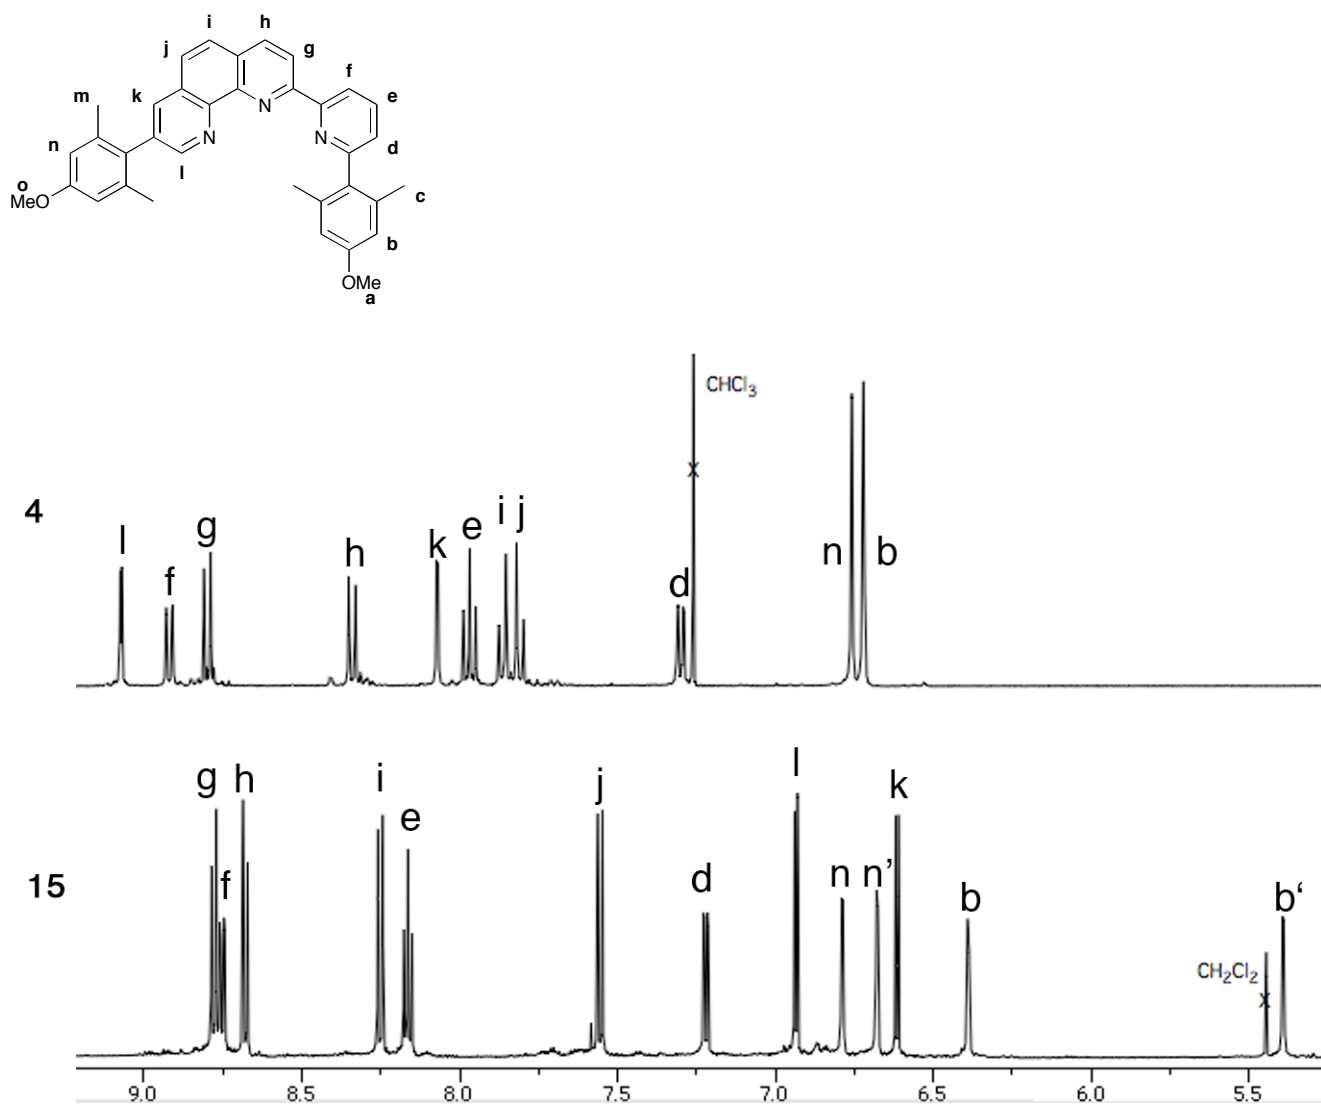

Fig. S2. <sup>1</sup>H NMR (400 MHz) of pyridyl-phenanthroline **4** in CDCl<sub>3</sub> and its Ru(II) complex **15** in CD<sub>2</sub>Cl<sub>2</sub>.

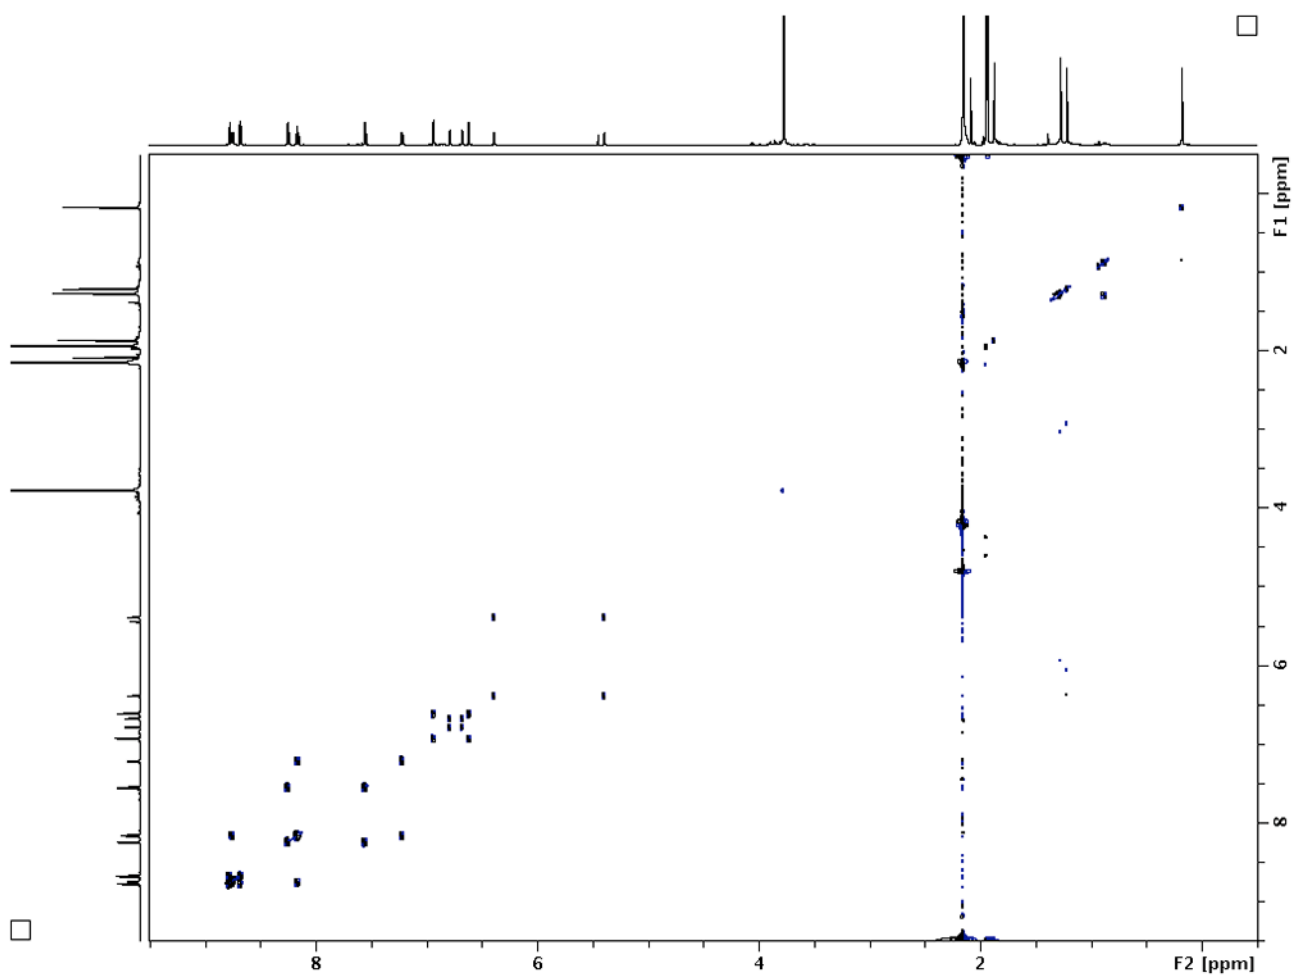

Fig. S3. COSY  $^1\text{H}$  NMR (600 MHz) of Ru(II) complex **15** in  $\text{CD}_2\text{Cl}_2$ .

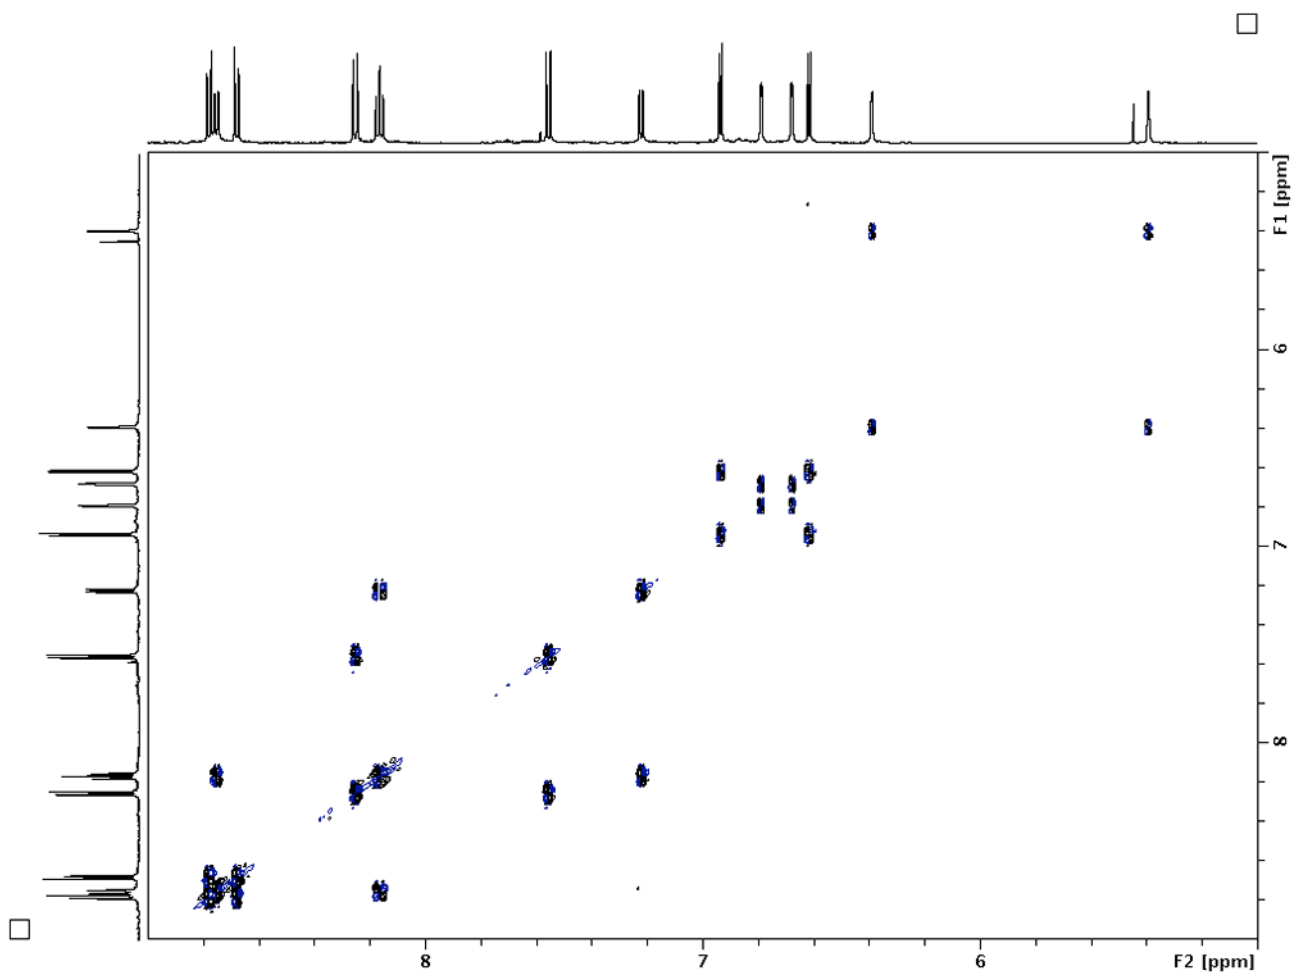

Fig. S4. Aromatic region of the COSY <sup>1</sup>H NMR (600 MHz) of Ru(II) complex **15** in CD<sub>2</sub>Cl<sub>2</sub>.

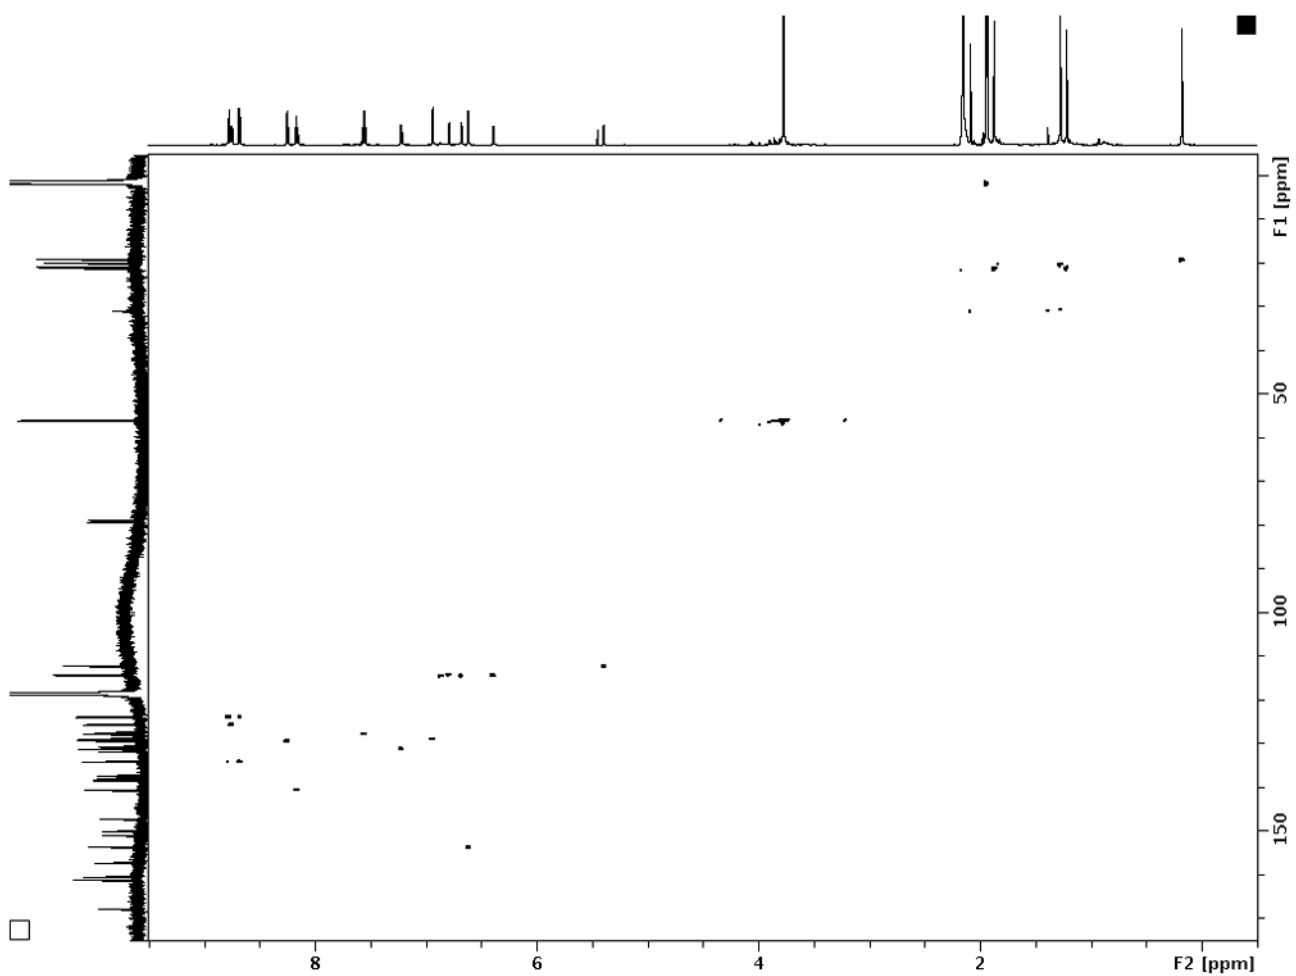

Fig. S5. HSQC NMR (600 MHz) of Ru(II) complex **15** in  $\text{CD}_2\text{Cl}_2$ .

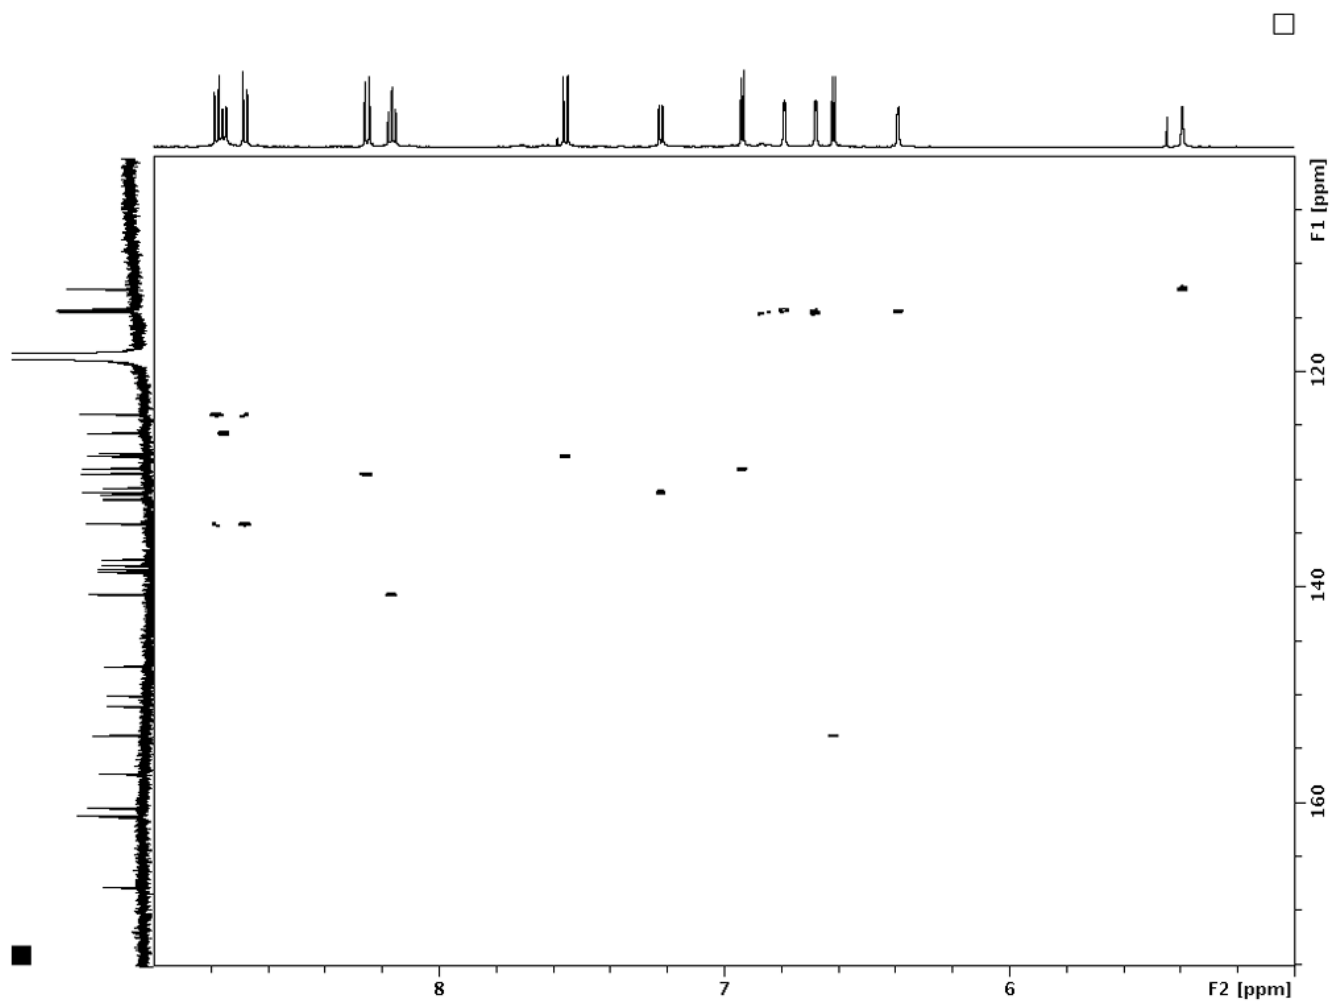

Fig. S6. Aromatic region of the HSQC NMR (600 MHz) of Ru(II) complex **15** in  $\text{CD}_2\text{Cl}_2$ .

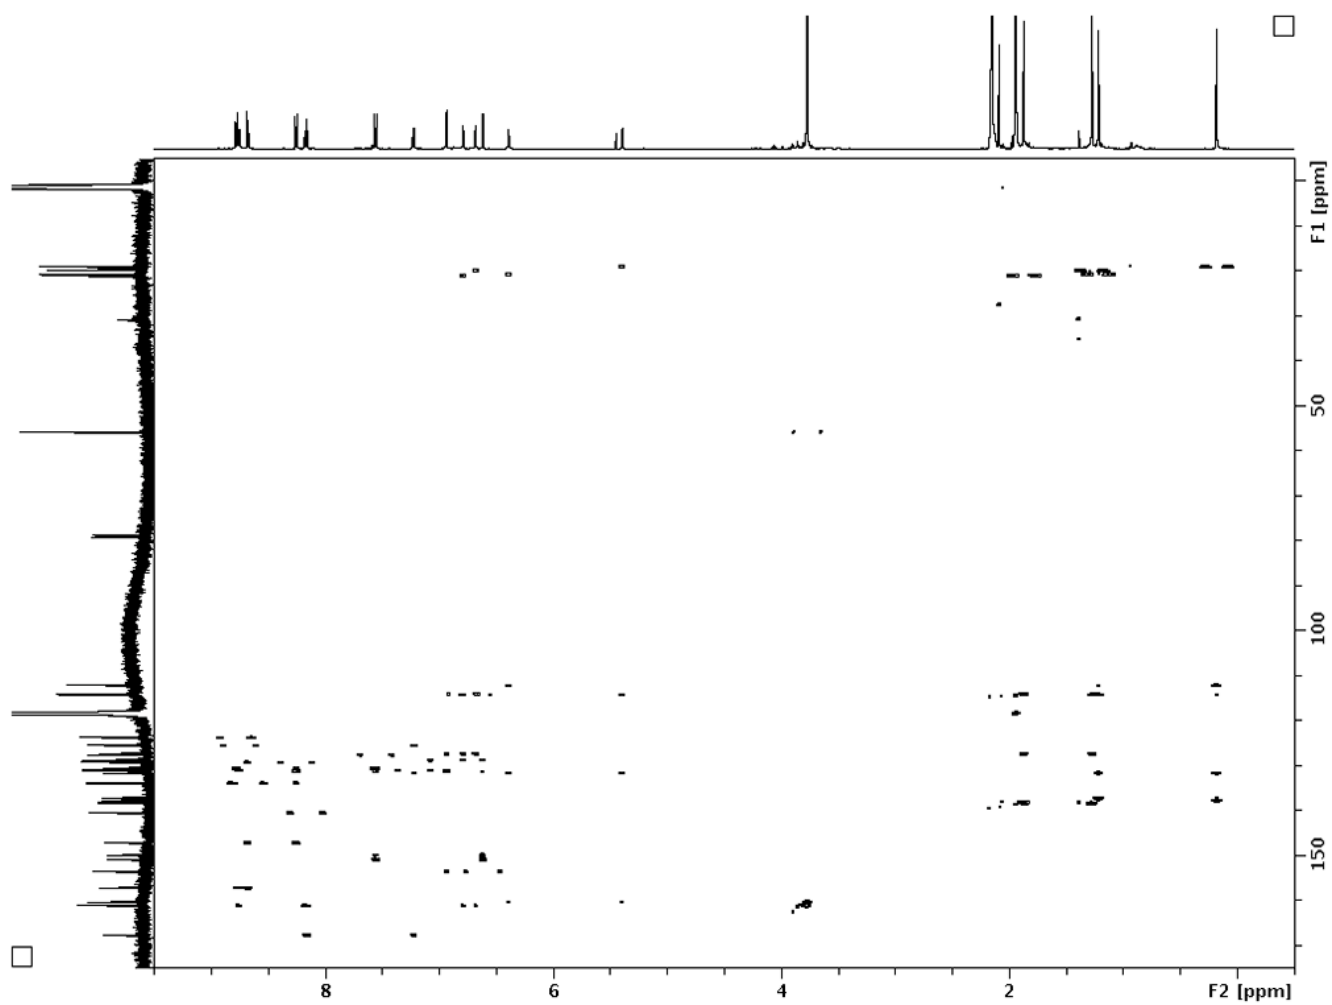

Fig. S7. Aromatic region of the HMBC NMR (600 MHz) of Ru(II) complex **15** in  $\text{CD}_2\text{Cl}_2$ .

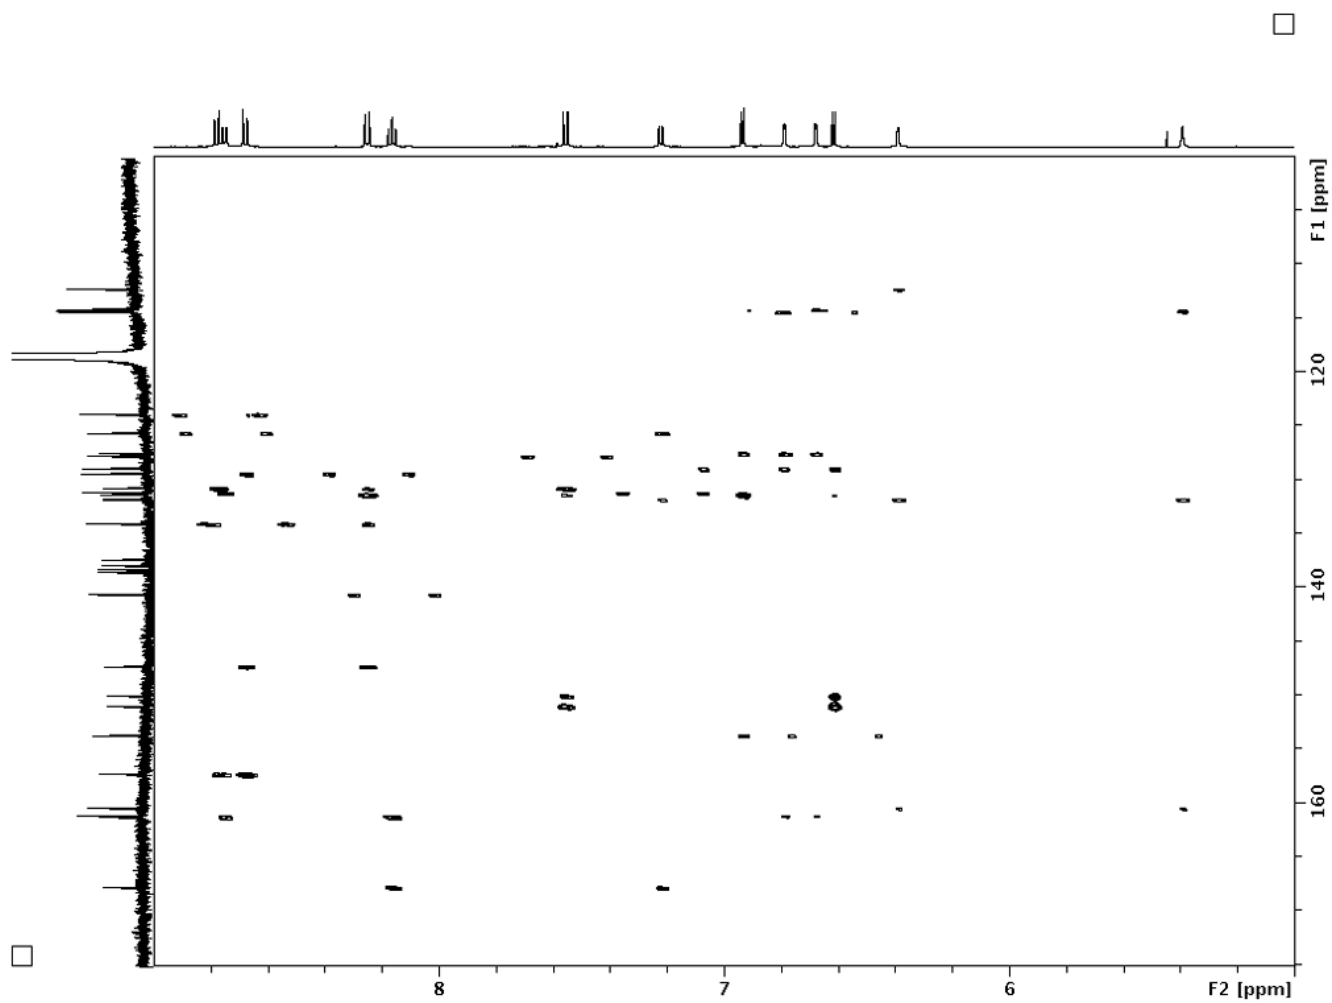

Fig. S8. Aromatic region of the HMBC NMR (600 MHz) of Ru(II) complex **15** in  $\text{CD}_2\text{Cl}_2$ .

#### References

- 30 1. The artifact at 450 nm results from the fluorimeter switching between monochromators.
